# Supplementary material for: Musculoskeletal injury epidemiology in law enforcement and firefighter recruits during physical training: a systematic review
Source: HighWire-hosted journal article supplement (doi:10.1136/bmjsem-2021-001289), 2022-02-01

**Appendix A.** Systematic Review Search Strategy

| <b>Number</b> | <b>Combiners</b>    | <b>Terms</b>                                                                |
|---------------|---------------------|-----------------------------------------------------------------------------|
| 1             | Problem of Interest | Injur*                                                                      |
| 2             | Participants        | Recruit* OR trainee*                                                        |
| 3             | Participants        | fire fight* OR first respon* OR emergency respon* OR police OR law enforce* |
| 4             | Exclusion           | review OR meta-analysis                                                     |
| 5             |                     | #1 AND #2 AND #3 NOT #4                                                     |
|               | Limitations         | Peer reviewed, human, English language,                                     |

**Appendix B.** Search Strategy Documentation

| Source:            | Date of search | Search strategy used (keywords & Boolean)                                                                                                                            | Search Limits or filters (e.g. dates, language) | # results found | Comments             |
|--------------------|----------------|----------------------------------------------------------------------------------------------------------------------------------------------------------------------|-------------------------------------------------|-----------------|----------------------|
| PUBMED             | 05/05/2021     | ((Injur*) AND (Recruit* OR trainee*)) AND (fire fight* OR first respon* OR emergency respon* OR police OR law enforce*) NOT (review OR meta-analysis)                | Human, English                                  | 664             | Exported to End Note |
| CINAHL (Full Text) | 05/05/2021     | ((Injur*) AND (Recruit* OR trainee*)) AND (fire fight* OR first respon* OR emergency respon* OR police OR law enforce*) NOT (review OR meta-analysis)                | Peer reviewed, human, English                   | 45              | Exported to End Note |
| CENTRAL            | 05/05/2021     | (Injury) AND (Recruit OR trainee) AND (fire fighter OR first response OR emergency response OR police OR law enforcement)                                            | Word variations, trials                         | 427             | Exported to End Note |
| SportsDISCUS       | 05/05/2021     | ((Injur*) AND (Recruit* OR trainee*)) AND (fire fight* OR first respon* OR emergency respon* OR police OR law enforce*) NOT (review OR meta-analysis)                | Peer-reviewed, English                          | 313             | Exported to End Note |
| Web of Science     | 05/05/2021     | ((AB= Injur* AND AB=(Recruit* OR trainee*) AND AB=( fire fight* OR first respon* OR emergency respon* OR police OR law enforce*)) NOT ALL=(review OR meta-analysis)) | English, article                                | 663             | Exported to End Note |
| Key Journals       |                |                                                                                                                                                                      |                                                 |                 | N/A                  |
|                    |                |                                                                                                                                                                      |                                                 | TOTAL           | 2112                 |

**Appendix C.** Reasons for full-text exclusion

| <b>Study</b>            | <b>Title</b>                                                                                                                                                                                           | <b>Reason for exclusion</b>             |
|-------------------------|--------------------------------------------------------------------------------------------------------------------------------------------------------------------------------------------------------|-----------------------------------------|
| Mann et al. 2008        | Stress fractures in female border police recruits during basic training                                                                                                                                | Conference abstract                     |
| Mann et al. 2008        | Stress fractures reduction by equipment modification in border police female fighters recruits: part II                                                                                                | Conference abstract                     |
| Mitrovic et al. 2016    | How an eight-month period without specialized physical education classes affects the morphological characteristics and motor abilities of students of the academy of criminalistic and police studies. | Wrong study design                      |
| Mostardi et al. 1990    | Pre-employment screening and health management for safety forces - methods and techniques                                                                                                              | Wrong patient population (not recruits) |
| Orr et al. 2016         | A functional movement screen profile of an Australian state police force: a retrospective cohort study                                                                                                 | Wrong study design                      |
| RuZBarska et al. 2010   | Analysis of motor performance indicators in medical rescuers                                                                                                                                           | Wrong patient population (not recruits) |
| Thabouillot et al. 2017 | Medical causes of temporary or definitive leaves from a French counterterrorist unit pre-internship                                                                                                    | Wrong patient population (not recruits) |

**Appendix D.** Medical injuries according to body region.

i) Orr et al. 2016b

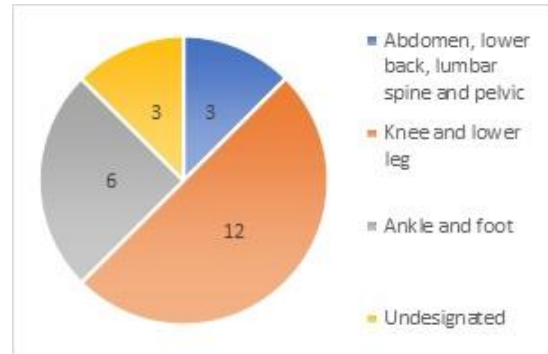

ii) Tomes et al. 2020

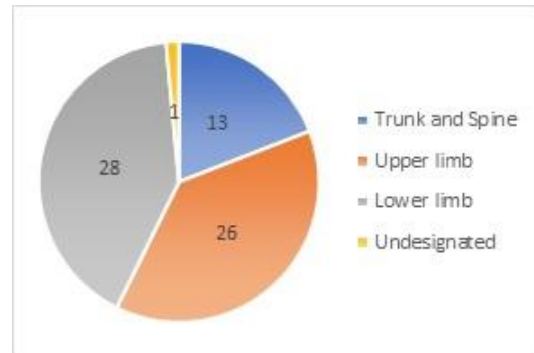

Supplement: bmjsem-2021-001289supp001_data_supplement.pdf [file bmjsem-2021-001289supp001_data_supplement.pdf]
